# Supplementary material
Source: ML conference proceedings conference paper supplement (https://proceedings.neurips.cc/paper_files/paper/2019/hash/d80126524c1e9641333502c664fc6ca1-Abstract.html)
Supplement: Supplementary file [file d80126524c1e9641333502c664fc6ca1-Supplemental.zip]

## A Additional results

In this section, we propose an empirical study of uncertainty quality over standard regression benchmarks such as the UCI datasets presented in [8, 18, 19]. Similarly to Figure 3, in Table 2 we have reported the mean absolute error between the amount of data points above or equal to a certain predicted probability and the ideal one. As shown here, UMAL still produces proper and calibrated conditional distribution.

Table 2: Mean and standard deviation for all folds of the mean absolute error between the predicted calibration and the perfect ideal calibration.

|         | Housing   | Concrete  | Energy    | Kin8nm    | Naval     | Power     | Protein   | Wine      | Yacht     |
|---------|-----------|-----------|-----------|-----------|-----------|-----------|-----------|-----------|-----------|
| N       | .08 ± .04 | .03 ± .01 | .03 ± .01 | .02 ± .01 | .39 ± .02 | .02 ± .01 | .03 ± .00 | .03 ± .01 | .06 ± .02 |
| L       | .07 ± .04 | .05 ± .02 | .04 ± .01 | .04 ± .01 | .35 ± .03 | .05 ± .01 | .02 ± .00 | .06 ± .02 | .07 ± .02 |
| I-QR    | .20 ± .05 | .18 ± .02 | .15 ± .04 | .17 ± .01 | .12 ± .05 | .20 ± .02 | .06 ± .01 | .19 ± .03 | .14 ± .06 |
| 2N-MDN  | .07 ± .05 | .04 ± .02 | .05 ± .02 | .01 ± .01 | .36 ± .04 | .03 ± .01 | .06 ± .01 | .08 ± .03 | .06 ± .02 |
| 3N-MDN  | .07 ± .05 | .07 ± .03 | .04 ± .02 | .02 ± .01 | .37 ± .04 | .03 ± .01 | .11 ± .01 | .15 ± .04 | .07 ± .02 |
| 4N-MDN  | .09 ± .05 | .10 ± .03 | .05 ± .02 | .03 ± .01 | .36 ± .05 | .03 ± .01 | .15 ± .01 | .18 ± .03 | .07 ± .04 |
| 10N-MDN | .12 ± .06 | .22 ± .06 | .09 ± .04 | .08 ± .01 | .33 ± .05 | .03 ± .01 | .22 ± .01 | .18 ± .02 | .09 ± .05 |
| 2L-MDN  | .09 ± .05 | .06 ± .02 | .05 ± .02 | .04 ± .01 | .32 ± .04 | .07 ± .02 | .07 ± .00 | .06 ± .02 | .06 ± .03 |
| 3L-MDN  | .11 ± .05 | .10 ± .03 | .08 ± .03 | .05 ± .01 | .29 ± .04 | .08 ± .02 | .12 ± .01 | .16 ± .03 | .06 ± .02 |
| 4L-MDN  | .14 ± .06 | .12 ± .03 | .08 ± .04 | .06 ± .01 | .31 ± .04 | .07 ± .02 | .15 ± .01 | .15 ± .02 | .05 ± .02 |
| 10L-MDN | .21 ± .05 | .18 ± .04 | .16 ± .05 | .11 ± .01 | .27 ± .06 | .08 ± .02 | .22 ± .01 | .17 ± .01 | .10 ± .04 |
| I-ALD   | .07 ± .06 | .04 ± .01 | .05 ± .02 | .04 ± .01 | .44 ± .01 | .04 ± .01 | .07 ± .00 | .03 ± .01 | .09 ± .04 |
| UMAL    | .10 ± .05 | .07 ± .04 | .06 ± .02 | .02 ± .01 | .43 ± .01 | .02 ± .01 | .02 ± .00 | .13 ± .06 | .06 ± .03 |

For the sake of completeness, we have also computed the UMAL negative log-likelihood for UCI datasets (see Table 3) following [19]. These results re-emphasise that UMAL is in the best positions. However, it should be noted that most of these databases have a **small sample size** and that aleatoric uncertainty cannot be reliably estimated in this regime. We hypothesize that a better solution would be to simultaneously estimate epistemic (as in [18, 19, 8]) and aleatoric uncertainty.

Table 3: Comparison of the Negative Mean Log-Likelihood of the test set over different train-test folds proposed in [8].

|         | Housing           | Concrete          | Energy            | Kin8nm      | Naval       | Power             | Protein           | Wine              | Yacht             |
|---------|-------------------|-------------------|-------------------|-------------|-------------|-------------------|-------------------|-------------------|-------------------|
| N       | 2.76 ± .34        | <b>3.20 ± .16</b> | <b>2.13 ± .24</b> | -1.15 ± .03 | -3.67 ± .01 | <b>2.83 ± .03</b> | 2.84 ± .03        | 1.05 ± .14        | <b>1.86 ± .31</b> |
| L       | <b>2.59 ± .20</b> | <b>3.21 ± .13</b> | <b>2.06 ± .20</b> | -1.08 ± .04 | -3.73 ± .04 | <b>2.87 ± .03</b> | 2.74 ± .01        | 1.00 ± .08        | <b>1.54 ± .37</b> |
| I-QR    | 10.96 ± 2.4       | 10.19 ± .95       | 9.45 ± 1.3        | 9.22 ± .66  | 5.14 ± .89  | 8.39 ± .45        | 8.14 ± .52        | 12.30 ± .91       | 10.32 ± 2.9       |
| 2N-MDN  | 2.74 ± .30        | 3.25 ± .21        | <b>2.02 ± .30</b> | -1.15 ± .05 | -3.66 ± .02 | <b>2.85 ± .05</b> | 2.56 ± .03        | 1.33 ± .61        | <b>1.55 ± .32</b> |
| 3N-MDN  | 2.68 ± .28        | 3.64 ± .28        | <b>2.30 ± .43</b> | -1.15 ± .05 | -3.66 ± .01 | <b>2.85 ± .04</b> | 2.90 ± .15        | 0.69 ± 1.0        | <b>1.54 ± .52</b> |
| 4N-MDN  | 2.87 ± .46        | 3.74 ± .28        | 2.46 ± .39        | -1.12 ± .04 | -3.66 ± .03 | <b>2.86 ± .05</b> | 3.32 ± .11        | <b>0.52 ± .90</b> | <b>1.43 ± .36</b> |
| 10N-MDN | 3.10 ± .46        | 5.64 ± 1.1        | 3.03 ± .71        | -0.99 ± .06 | -3.64 ± .03 | <b>2.86 ± .04</b> | 4.94 ± .75        | 0.75 ± .95        | <b>1.75 ± .49</b> |
| 2L-MDN  | 2.61 ± .23        | <b>3.28 ± .14</b> | <b>2.06 ± .30</b> | -1.10 ± .04 | -3.70 ± .06 | 2.91 ± .05        | 2.50 ± .03        | 0.59 ± .63        | <b>1.37 ± .42</b> |
| 3L-MDN  | 2.65 ± .25        | 3.45 ± .16        | <b>2.30 ± .21</b> | -1.09 ± .03 | -3.66 ± .06 | 2.95 ± .04        | 2.65 ± .06        | -0.81 ± .70       | <b>1.39 ± .35</b> |
| 4L-MDN  | 2.76 ± .42        | 3.57 ± .14        | <b>2.31 ± .35</b> | -1.10 ± .05 | -3.68 ± .06 | 2.93 ± .04        | 2.79 ± .08        | -0.65 ± .96       | <b>1.45 ± .35</b> |
| 10L-MDN | 3.17 ± .46        | 3.95 ± .34        | 2.80 ± .49        | -0.98 ± .07 | -3.62 ± .10 | 2.96 ± .05        | 3.46 ± .12        | 0.52 ± .74        | <b>1.63 ± .34</b> |
| I-ALD   | 2.79 ± .56        | 3.87 ± .12        | <b>2.28 ± .11</b> | -1.00 ± .05 | -2.82 ± .01 | <b>2.89 ± .02</b> | 2.68 ± .01        | 1.01 ± .07        | <b>1.78 ± .41</b> |
| UMAL    | <b>2.59 ± .26</b> | 3.74 ± .15        | <b>2.13 ± .14</b> | -1.09 ± .03 | -2.81 ± .01 | <b>2.85 ± .03</b> | <b>2.40 ± .01</b> | <b>0.14 ± .70</b> | <b>1.41 ± .38</b> |
